# Supplementary material
Source: Research Square preprint supplement (doi:10.21203/rs.3.rs-9117199/v1)

anti-EPOP

anti-syndapin I

anti-MAP2

Merge

DAPI

DIV7

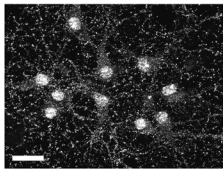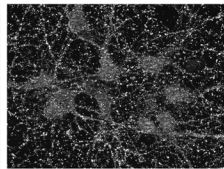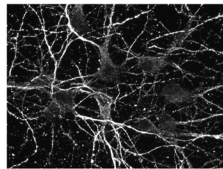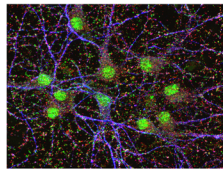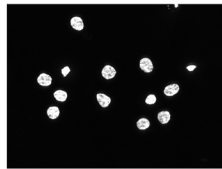

DIV14

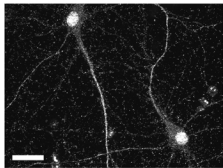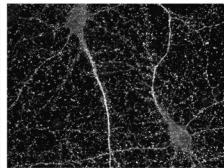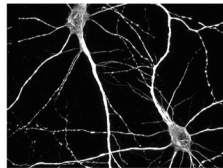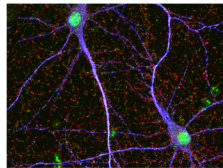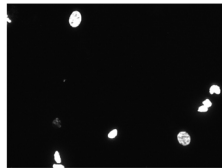

DIV21

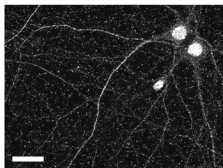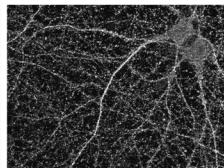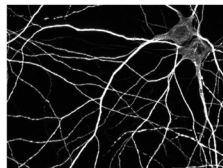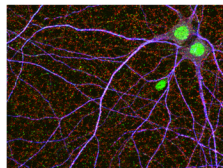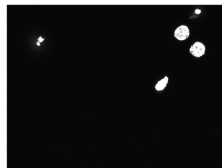

Supplement: Supplementary file 1 [file 0dc688f3988ca47b4283e179.pdf]

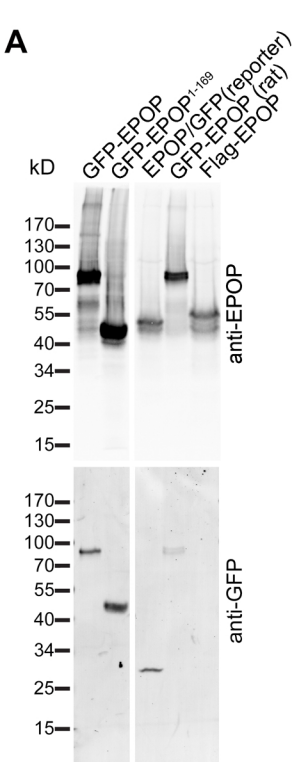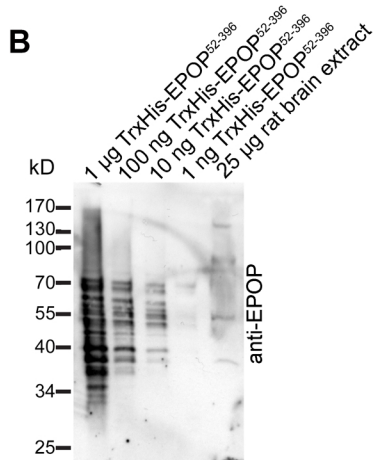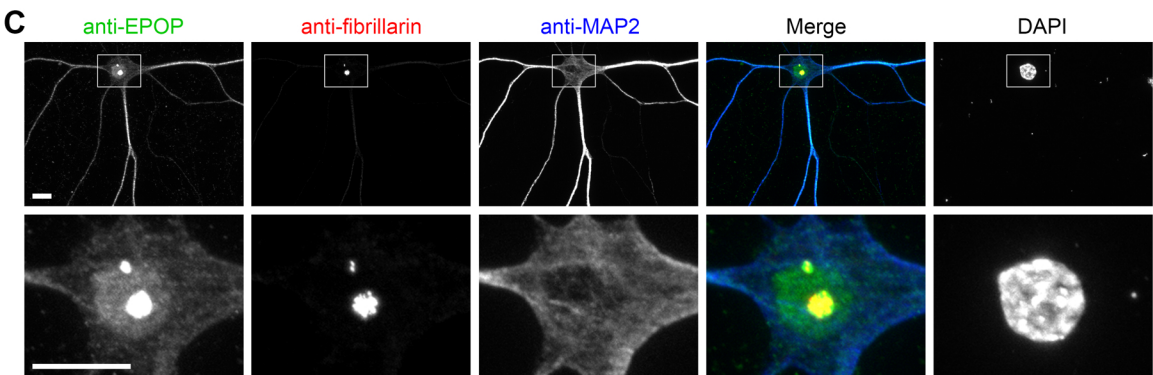

Supplement: Supplementary file 2 [file 304230b6c5499e627fc7de7e.pdf]

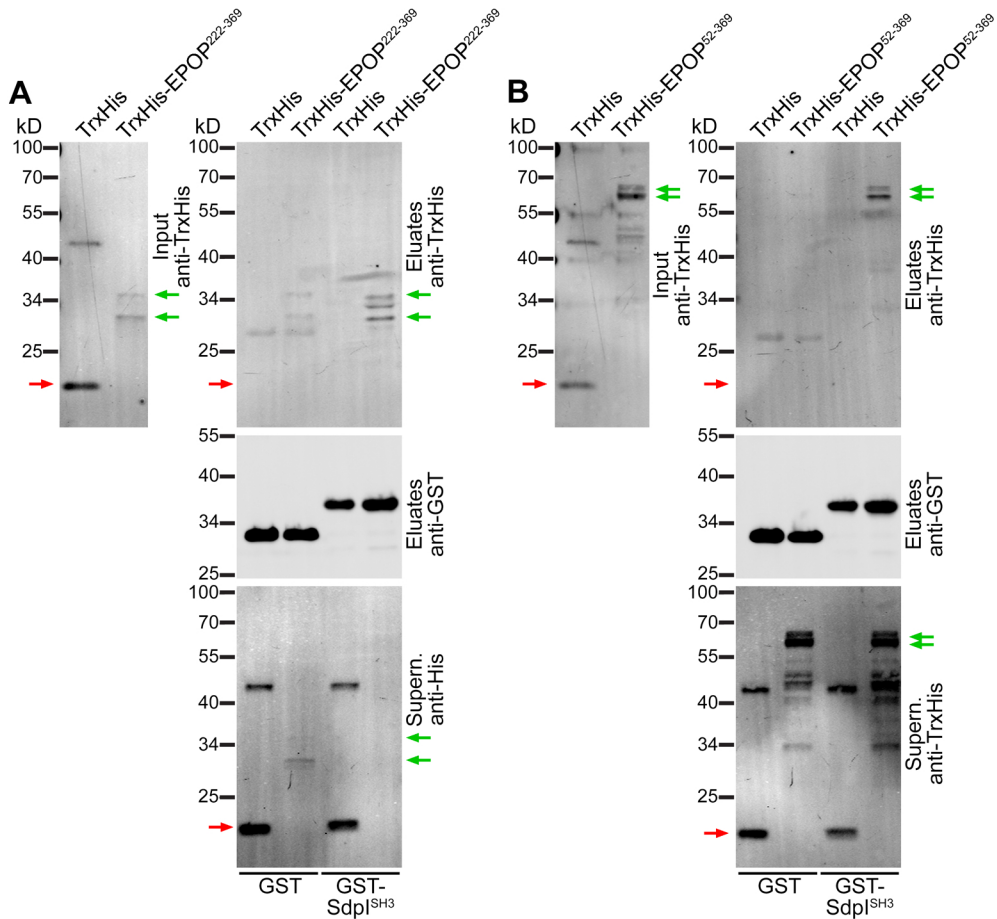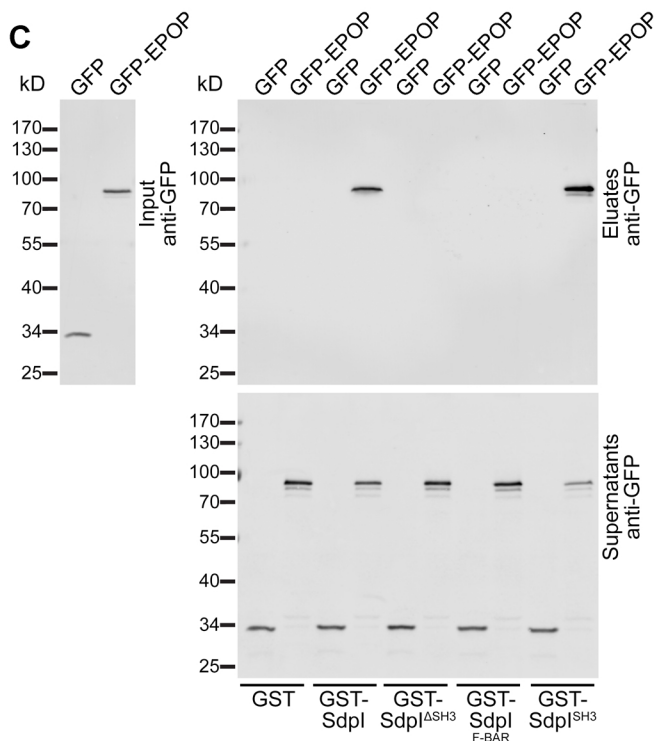

Supplement: Supplementary file 3 [file 8a5f55b813e4be29857182ac.pdf]
